# Supplementary material
Source: HighWire-hosted journal article supplement (http://www.cmaj.ca/highwire/filestream/71446/field_highwire_adjunct_files/0/180705-image-1-at.pdf)
Supplement: 180705-image-1-at.pdf [file 180705-image-1-at.pdf]

Appendix 1

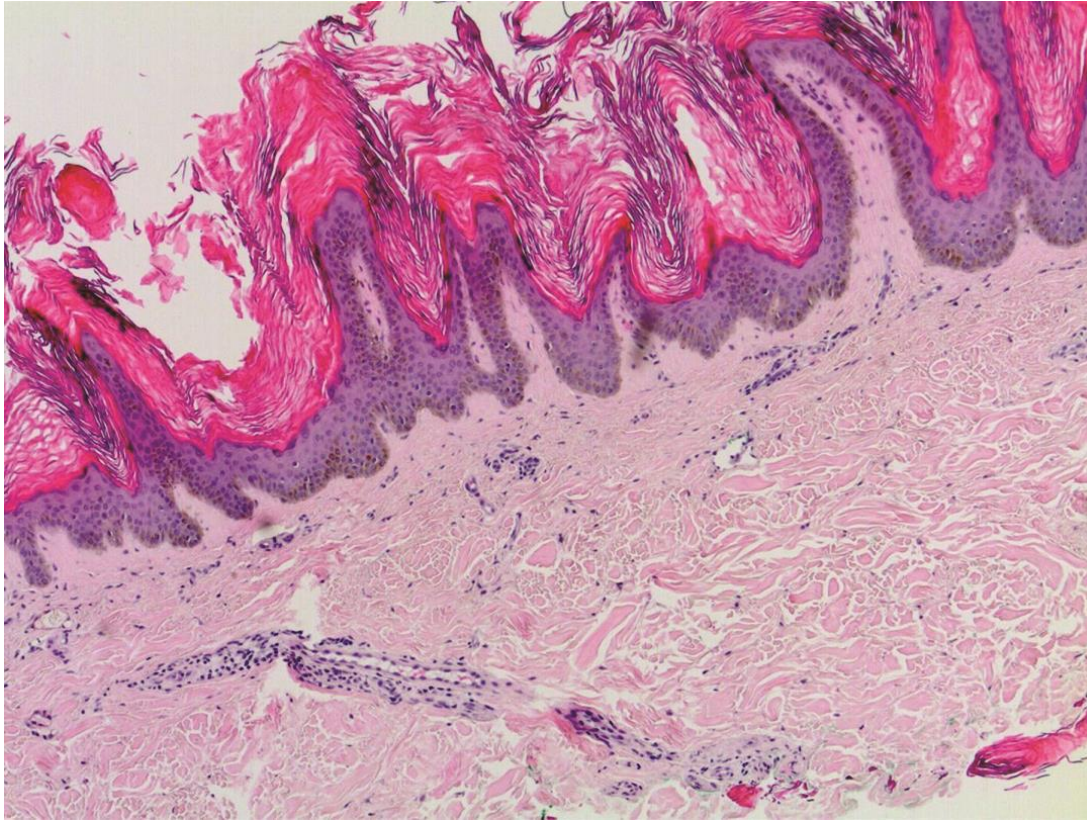

Biopsy of a 69-year-old man showing marked compact hyperkeratosis, acanthosis and papillomatosis in the epidermis.
